# Supplementary material
Source: PubMed Central journal article supplement (PMC4154631)

1 **ONLINE REPOSITORY TEXT**

2 **Vitamin D<sub>3</sub> represses IgE-dependent mast cell activation via mast cell-CYP27B1 and -**  
3 **vitamin D receptor activity**

4

5 **Kwok-Ho Yip, PhD,\* Natasha Kolesnikoff, PhD,\* Chunping Yu, BSc(Hons), Nicholas**

6 **Hauschild, BSc(Hons), Hong Taing, BSc(Hons), Lisa Biggs, BSc(Hons), David**

7 **Goltzman, MD, Philip A. Gregory, PhD, Paul H. Anderson, PhD, Michael S. Samuel,**

8 **PhD, Stephen J. Galli, MD, Angel F. Lopez, PhD, and Michele A. Grimaldeston, PhD<sup>#</sup>**

9

10 Inventory

11 1. Online Repository Methods

12 2. Online Repository Figure Legends

13

14 **ONLINE REPOSITORY METHODS**15 **Mice**

16 B6.129S4-*Vdr*<sup>tm1Mbd</sup>/J mice were backcrossed to C57BL/6 mice for greater than nine  
17 generations. As previously reported, adult *Kit*<sup>W-sh/Wsh</sup> and *Kit*<sup>W/W-v</sup> mice have a profound  
18 deficiency of mast cells, including <1.0% the WT level of mast cells in the dermis<sup>E1-3</sup>. All  
19 mice (including *VDR*<sup>-/-</sup> mice) with the exception of *CYP27BI*<sup>-/-</sup> mice, were provided  
20 commercial mouse chow containing Vitamin D<sub>3</sub> (cholecalciferol) at >2,000 IU/kg *ad libitum*.  
21 Derivation of parental strain was undertaken by homologous recombination in embryonic  
22 stems where a neomycin resistance gene was inserted in place of exons VI, VII and VIII of  
23 the mouse *CYP27BI* gene, replacing both the ligand binding and heme binding domains, as  
24 previously described<sup>E4</sup>. These mice were originally maintained on a mixed genetic  
25 background with B6 and BALB/c strains and then backcrossed for an additional 3  
26 generations with C57BL/6 mice in house in Adelaide. *CYP27BI*<sup>-/-</sup> mice were maintained on a  
27 high calcium diet containing 1.5% calcium in drinking water and chow containing 1%  
28 calcium, 0.85% phosphorus, 0% lactose and 2200 IU/kg Vitamin D<sub>3</sub> (Specialty Feeds).  
29 Experiments were performed in compliance with the ethical guidelines of the National Health  
30 and Medical Research Council of Australia, with approval from the Institute of Medical and  
31 Veterinary Science Animal Ethics Committee (Australia).

32

33 **Generation of BMCMCs**

34 As previously described<sup>E2, 5</sup>, BMCMCs were obtained by culturing bone marrow cells from  
35 femurs and tibiae of mice in DMEM (Life Technologies) supplemented with 10% fetal calf  
36 serum (FCS; Bovogen) and 20% WEHI-3 conditioned medium (containing 3-4 ng/mL IL-3)

37 for 4-6 wk, at which time > 95% of the cells were identified as mast cells by May Grünwald-  
38 Giemsa staining and by flow cytometric analysis (c-Kit<sup>+</sup>, FcεRI<sup>+</sup>).

39

#### 40 **Preparation of vitamin D<sub>3</sub>**

41 1α,25-dihydroxyvitamin D<sub>3</sub> (1α,25(OH)<sub>2</sub>D<sub>3</sub>) and 25-hydroxyvitamin D<sub>3</sub> (25OHD<sub>3</sub>) (Sigma-  
42 Aldrich) were reconstituted at 1 or 10 mM with 100% absolute ethanol (EtOH; Sigma-  
43 Aldrich) and stored, shielded from light, in an airtight tube at -80°C. The chemical integrity  
44 of both metabolites was regularly verified using a scanning spectrophotometer.

45

#### 46 **Multiple epicutaneous applications of vitamin D<sub>3</sub> with or without IgE-dependent PCA.**

47 For experiments where 1α,25(OH)<sub>2</sub>D<sub>3</sub> was epicutaneously applied a total of 9 times every 2 d  
48 in the absence of PCA, female C57BL/6J mice received per application a dose of 0.06  
49 nmol/ear (3 μM in 20 μL of EPGW vehicle) or 0.25 nmol/ear (12.5 μM in 20 μL of 100%  
50 EtOH vehicle) to the right ear or vehicle alone as indicated to the left ear and change in ear  
51 thickness from baseline measured prior to each application. For some experiments on the  
52 same day as the final application of 1α,25(OH)<sub>2</sub>D<sub>3</sub>, mice were *i.d.* injected with 20 ng IgE  
53 anti-DNP in the right ear, or vehicle HMEM-Pipes in the left ear. 16h later, mice were *i.v.*  
54 injected with 200 μg of DNP-HSA and changes ( $\Delta$ ) in ear thickness 0-6 h were measured and  
55 calculated from baseline measured at day 0 prior to first application of 1α,25(OH)<sub>2</sub>D<sub>3</sub>. For all  
56 experiments, ear pinnae were collected for histological analysis and gene expression analysis  
57 24 h after the final application of 1α,25(OH)<sub>2</sub>D<sub>3</sub> or 6 h after induction of the PCA reaction.

58

#### 59 **Histology and quantification of mast cell numbers**

60 Mice were killed by CO<sub>2</sub> inhalation and samples of ear pinna were fixed in 10% buffered  
61 formalin, embedded in paraffin (with care to ensure a cross-section orientation), and 4-μm

62 sections were cut. Ear sections were stained with 0.1% Toluidine Blue (pH 1.0) for the  
63 detection of mast cells (cytoplasmic granules appear purple). Ear pinna mast cells were  
64 counted in 6-9 consecutive fixed fields of 870  $\mu\text{m}$  width using a 20x microscope objective  
65 (200 $\times$  final magnification), and mast cell numbers were expressed per horizontal ear cartilage  
66 field length (millimeter), using computer-generated image analysis (NIH Image J software,  
67 version 1.46<sup>f</sup>). The entire length of a strip of skin extending from the base to the tip of the ear  
68 pinna (~5.4-8.1 mm) was quantified. After *i.d.* engraftment of BMCMCs, *Kit*<sup>W-sh/W-sh</sup> or  
69 *Kit*<sup>W/W<sup>v</sup></sup> mice exhibited mast cells from the base to the tip of the ear pinnae, in an anatomical  
70 distribution similar to that of the native mast cell populations in the corresponding WT mice.

71

## 72 **Immunofluorescence**

73 For CYP27B1 immunofluorescence in BMCMCs, cells were centrifuged at 500 rpm for 5  
74 min onto Polysine<sup>TM</sup> slides (Menzel-Glaser), fixed with 150  $\mu\text{L}$  IC Fixation buffer (Fixation  
75 & Permeabilisation Kit; eBioscience) for 20 min at room temperature before washing in  
76 Permeabilization Buffer (eBioscience) for 5 min. Cells were then incubated with 3  $\mu\text{g}/\text{mL}$   
77 rabbit anti-CYP27B1 Ab (Santa Cruz Biotechnology) or 3  $\mu\text{g}/\text{mL}$  rabbit polyclonal IgG  
78 isotype control Ab (Dako) for 16 h at 4 $^{\circ}\text{C}$ . Slides were then rinsed three times in  
79 Permeabilization Buffer and incubated with Alexa 594-conjugated goat anti-rabbit Ab (1:200  
80 dilution; Molecular Probes) for 1 h at room temperature in the dark. Following three  
81 additional washes in Permeabilization Buffer, cells were incubated with 1  $\mu\text{g}/\text{mL}$  DAPI  
82 (Roche) for 2 min at room temperature, rinsed in Permeabilization Buffer, mounted with  
83 Fluorescence Mounting Medium (Dako) and imaged using a Nikon Spectral Imaging  
84 Confocal Microscope Digital Eclipse C1si and EZ-C1 software (version 3.20).

85

## 86 **Preparation of human mast cells**

87 Mature cord blood-derived mast cells (CBMCs) or peripheral blood-derived mast cells  
88 (PBMCs) were generated by first isolating CD34<sup>+</sup> progenitor cells from human umbilical  
89 cord blood or human buffy coat provided by Australian Red Cross, respectively. Briefly,  
90 blood was diluted with sterile phosphate buffered saline (PBS) at a ratio of 1:1, layered gently  
91 over Histopaque®-1077 (1.77 g/L; Sigma-Aldrich) and after centrifugation (600 g, 30 min),  
92 the interface containing mononuclear cells was harvested and the remaining red blood cells  
93 were disrupted with haemolytic solution (155 mM NH<sub>4</sub>Cl, 10 mM KHCO<sub>3</sub>, 0.1 mM EDTA  
94 2Na). CD34<sup>+</sup> progenitor cells were enriched by positive immunomagnetic selection using  
95 CD34 MicroBeads and an autoMACS Separator (Miltenyi Biotec) according to the  
96 manufacturer's instructions. The isolated CD34<sup>+</sup> cells were then transferred into 12-well  
97 plates at a density of 5 x 10<sup>6</sup> cells/mL in IMDM medium (Life Technologies) supplemented  
98 with 1% insulin-transferrin-selenium (Life Technologies), 5 x 10<sup>-5</sup> M 2-mercaptoethanol (Life  
99 Technologies), 1% penicillin-streptomycin (Life Technologies), 0.1% bovine serum albumin  
100 (BSA; Sigma-Aldrich), 100 ng/ml recombinant human (rh) SCF, 50 ng/ml rhIL-6 and 1  
101 ng/ml rhIL-3 (all rh cytokines from Shenandoah Biotechnology INC.) and placed in a CO<sub>2</sub>  
102 incubator at 37° C. The cytokine-supplemented medium was replaced weekly and rhIL-3 was  
103 omitted from the medium after the first 2 wk of culture. From 6 wk, 10% FCS was added to  
104 the medium, and CBMCs or PBMCs used at 10 wk of culture. At that time, the populations  
105 contained 96% mast cells as determined by May Grünwald-Giemsa staining and by flow  
106 cytometric analysis (tryptase<sup>+</sup>; 10 µg/mL; Millipore).

107

#### 108 **Measurement of histamine and cysteinyl leukotriene**

109 BMCs and CBMCs or PBMCs were pre-incubated in 10% charcoal-stripped-FCS  
110 complete medium for 72 h, supplemented with the vitamin D<sub>3</sub> metabolites and sensitized with  
111 IgE as outlined above for mast cell activation *in vitro*. Following the 16 h IgE-sensitization

112 BMCMCs or CBMCs or PBMCs ( $10^6$  cells/mL) were re-suspended in Tyrodes buffer and  
113 then activated with DNP-HSA (10 ng/ml; BMCMCs) or anti-human IgE Ab (1  $\mu$ g/mL;  
114 CBMCs or PBMCs) for 30 min at 37° C in the presence of  $1\alpha,25(\text{OH})_2\text{D}_3$  ( $10^{-8}$  -  $10^{-6}$  M) or  
115  $25\text{OHD}_3$  ( $10^{-8}$  -  $10^{-6}$  M) or EtOH (0.03%). Histamine or Cys-LT levels in supernatants and  
116 corresponding cell lysates (histamine only) were measured using histamine (Beckman  
117 Coulter) or Cys-LT EIA (Cayman Chemical) kits according to manufacturers' instructions.

118

### 119 **Immunoblotting**

120 BMCMCs and CBMCs were pre-incubated in 10% charcoal-stripped-FCS complete medium  
121 for 72 h, then treated with  $25\text{OHD}_3$  ( $10^{-8}$  or  $10^{-7}$  M) for 3 and 8 h, and lysed in ice-cold lysis  
122 buffer (50 mM Tris-base, 100 mM NaCl, 5 mM EDTA, 67 mM  $\text{Na}_4\text{P}_2\text{O}_7$ , 0.01% Triton X-  
123 100 and complete protease inhibitors cocktail [Roche]). Proteins were separated with SDS-  
124 polyacrylamide gel electrophoresis and transferred to nitrocellulose membranes. Membranes  
125 were blocked with 5% non-fat dry milk in Tris-buffered saline that contained 0.1% Tween-  
126 20; they were then probed with a rabbit anti-CYP27B1 antibody (600 ng/mL; Santa Cruz  
127 Biotechnology) or rabbit anti- $\beta$ -actin antibody (1:1000 dilution; Cell Signaling) overnight at  
128 4°C. Membranes were then probed with horseradish peroxidase-conjugated antibody against  
129 rabbit IgG (1:2000 dilution; Cell Signaling) and bands visualized using ECL reagent  
130 (Amersham) with a LAS4000 imaging system (Fujifilm).

131 For cells that were sensitized with IgE anti-DNP mAb (SPE-7; 2mg/ml), IgE was  
132 added to the cells at the same time as administration of  $1\alpha,25(\text{OH})_2\text{D}_3$  ( $10^{-7}$  M) or vehicle  
133 (0.03% EtOH) and incubated for 16 h at 37° C in a CO<sub>2</sub> incubator. Cells were centrifuged 180  
134 x g for 5 min, resuspended in Tyrode's buffer (129 mM NaCl, 8.4 mM glucose, 10 mM  
135 HEPES, 5 mM KCl, 1 mM  $\text{MgCl}_2$ , 1.4 mM  $\text{CaCl}_2$  and 1% BSA at pH 7.4), centrifuged again  
136 and then resuspended with Tyrode's buffer at  $4 \times 10^6$  cells/mL. Cells were activated with 10

137 ng/mL of DNP-HSA-specific antigen for 2 or 15 min at 37 °C in the presence of  
138  $1\alpha,25(\text{OH})_2\text{D}_3$  ( $10^{-7}$  M) or EtOH (0.03%). The reaction was quenched by the addition of ice-  
139 cold buffer followed immediately by centrifugation at  $180 \times g$  for 5 min at 4 °C. Cells were  
140 lysed in ice-cold lysis buffer, electrophoretically transferred and bands visualized using the  
141 same protocol as detailed above with the exception that membranes were probed with rabbit  
142 anti-phospho-Erk1/2, anti-phospho-p-38, anti-phospho-JNK1/2 and anti-phospho-NF- $\kappa$ B-  
143 p65. Stripped membranes were then probed with total form of anti-Erk1/2, anti-p-38, anti-  
144 JNK1/2 and anti-NF- $\kappa$ B-p65 (all including phosphor-antibodies were used at 1:1000 dilution;  
145 Cell Signaling). Immunoblots presented in figures are representative of 2 or 3 similar  
146 independent experiments.

147

#### 148 **Flow cytometric analysis**

149 BMCMCs were incubated with  $1\alpha,25(\text{OH})_2\text{D}_3$  ( $10^{-8}$  -  $10^{-7}$  M) and IgE anti-DNP Ab (2  
150  $\mu\text{g}/\text{ml}$ ) for 16 h before cell surface Fc $\epsilon$ RI and c-kit expression determination. BMCMCs were  
151 washed in FACS buffer (PBS with 2% FCS) and incubated with anti-mouse CD16/CD32  
152 mAb (1  $\mu\text{g}/\text{mL}$ ) on ice for 15 min. After FcR blocking, BMCMCs were incubated with anti-  
153 Fc $\epsilon$ RI $\alpha$ -FITC (2.5  $\mu\text{g}/\text{mL}$ ; eBioscience) or anti-c-kit-PE (2  $\mu\text{g}/\text{mL}$ ) antibodies or isotype  
154 control American hamster IgG-FITC (2.5  $\mu\text{g}/\text{mL}$ ) and rat IgG2b-PE (2.5  $\mu\text{g}/\text{mL}$ ) antibody for  
155 30 min on ice and then analysed on a Beckman Coulter Cytomics FC500 and using CXP  
156 Cytometry List Mode Data Acquisition and Analysis Software version 2.2 (Beckman  
157 Coulter). All antibodies were obtained from eBioscience. For BMCMC-CYP27B1  
158 expression, cells were incubated with rabbit anti-CYP27B1 Ab (3  $\mu\text{g}/\text{mL}$ ; Santa Cruz  
159 Biotechnology) or isotype control rabbit IgG Ab (3  $\mu\text{g}/\text{mL}$ ; Dako) in Permeabilization Buffer  
160 (eBioscience) for 30 min on ice, then incubated with Alexa 594-conjugated goat anti-rabbit  
161 Ab (1:100 dilution; Molecular Probes) for 30 min on ice, and finally analysed by flow

162 cytometry. For determination of CBMC-VDR expression, cells were fixed in IC fixation  
163 buffer (eBioscience) for 20 min at room temperature, incubated with rat anti-VDR antibody  
164 (10 µg/mL; Millipore) or isotype control rat IgG2a antibody (2 µg/mL; eBioscience) in  
165 Permeabilization buffer (eBioscience) for 30 min on ice. Cells were washed, incubated with  
166 goat anti-rat FITC-conjugated antibody (1:100 dilution; Life Technologies) for 30 min on ice  
167 and then analysed by flow cytometry.

168

### 169 **RNA extraction and real-time PCR**

170 Ear pinnae were finely sliced, sonicated in 500 µl TRIzol reagent (Life Technologies) from  
171 which RNA was extracted according to the manufacturer's instructions. For mRNA analysis,  
172 0.5 µg of RNA was used for complementary DNA (cDNA) synthesis using the QuantiTect  
173 reverse transcription kit (QIAGEN). Quantitative real-time PCR was performed using a 1:4  
174 dilution of cDNA with the QuantiTect SYBR Green PCR System (QIAGEN) on a Rotor-  
175 Gene 6000 PCR machine (QIAGEN). PCR assays were performed for 45 cycles (95° C for  
176 15 s, 55° C for 20 s, and 72 °C for 20 s). Relative expression levels of TSLP mRNA was  
177 normalised to glyceraldehyde 3-phosphate dehydrogenase (GAPDH) control using the Rotor-  
178 Gene Series 6000 Software (QIAGEN). The following oligonucleotide sequences were used:  
179 TSLP, forward 5'-AGCTTGCTCCTGAAAATCGAG-3', reverse 5'-  
180 AGGTTTGATTCAGGCAGATGTT-3'; LTC4S, forward 5'-  
181 ATGAAGGACGAAGTGGCTCTT-3', reverse 5'-CCTGTAGGGAGAAGTAGGCTTG-3';  
182 HDC, forward 5'- AGGAGCAATCCAAGGGAGAT-3', reverse 5'-  
183 GGTATCCAGGCTGCACATTT-3', and GAPDH forward 5'-  
184 ACATCATCCCTGCATCCACT-3', reverse 5'-ACTTGGCAGGTTTCTCCAG-3'.  
185 CYP27B1 cDNA was primed using the Mm\_Cyp27b1\_1\_SG QuantiTect primer assay  
186 (QIAGEN) and PCR was conducted according to the manufacturer's instructions.



187

188

189 **Measurement of  $1\alpha,25(\text{OH})_2\text{D}_3$  in BMCMCs and CBMCs**

190 Five wk old BMCMCs (WT [VDR mouse colony] or  $VDR^{-/-}$  or WT [CYP27B1 mouse  
191 colony] or  $CYP27B1^{-/-}$  or 10 wk old CBMCs ( $2 \times 10^6$  cells/ml) were pre-incubated in 10%  
192 charcoal-stripped-FCS complete medium (DMEM or IMDM, respectively) for 72 h in a  $\text{CO}_2$   
193 incubator at  $37^\circ\text{C}$ . Cells were then replenished with the charcoal-stripped-FCS DMEM  
194 (supplemented with 3 ng/mL rmIL-3 for BMCMCs) and IMDM (supplemented with 100  
195 ng/mL rhSCF, 50 ng/mL rhIL-6 for CBMCs). For CBMCs,  $2 \times 10^6$  cells/mL were incubated  
196 with  $25\text{OHD}_3$  ( $10^{-7}$  or  $10^{-6}$  M) or EtOH (0.03%) for 6-7 h, whereas BMCMCs ( $2 \times 10^6$   
197 cells/mL) were incubated for 24 h and the supernatant replaced with new medium containing  
198  $25\text{OHD}_3$  ( $10^{-7}$  or  $10^{-6}$  M) for a further 6 h incubation. Culture supernatants and cell lysates  
199 were collected and snap-frozen in liquid nitrogen. Samples were stored, shielded from light,  
200 at  $-80^\circ\text{C}$  until analysis. Levels of  $1\alpha,25(\text{OH})_2\text{D}_3$  supernatants and corresponding cell lysates  
201 were measured using a radioimmunoassay kit (Immunodiagnostic Systems) according to the  
202 manufacturer's instructions. Mast cell production of  $1\alpha,25(\text{OH})_2\text{D}_3$  was determined as the  
203 amount measured in the cell lysate + the supernatant and expressed as pM.

204

205 **REFERENCES**

- 206 E1. Grimaldeston MA, Chen CC, Piliponsky AM, Tsai M, Tam S-Y, Galli SJ. Mast cell-  
207 deficient *W-sash c-kit* mutant *Kit<sup>W-sh/W-sh</sup>* mice as a model for investigating mast cell  
208 biology *in vivo*. Am J Pathol. 2005; 167:835-48.
- 209 E2. Grimaldeston MA, Nakae S, Kalesnikoff J, Tsai M, Galli SJ. Mast cell-derived  
210 interleukin 10 limits skin pathology in contact dermatitis and chronic irradiation with  
211 ultraviolet B. Nat Immunol. 2007; 8:1095-104. Epub 2007 Sep 2.

- 212 E3. Galli SJ, Grimaldeston M, Tsai M. Immunomodulatory mast cells: negative, as well  
213 as positive, regulators of immunity. *Nat Rev Immunol.* 2008; 8:478-86.
- 214 E4. Panda DK, Miao D, Tremblay ML, Sirois J, Farookhi R, Hendy GN, et al. Targeted  
215 ablation of the 25-hydroxyvitamin D 1alpha -hydroxylase enzyme: evidence for  
216 skeletal, reproductive, and immune dysfunction. *Proc Natl Acad Sci U S A* 2001;  
217 98:7498-503.
- 218 E5. Biggs L, Yu C, Fedoric B, Lopez AF, Galli SJ, Grimaldeston MA. Evidence that  
219 vitamin D<sub>3</sub> promotes mast cell-dependent reduction of chronic UVB-induced skin  
220 pathology in mice. *J Exp Med* 2010; 207:455-63.

221

222 **ONLINE REPOSITORY FIGURE LEGENDS**

223

224

225 **Figure E1.  $1\alpha,25(\text{OH})_2\text{D}_3$  treatment does not alter key signalling events downstream of**226 **IgE-Fc $\epsilon$ RI activation or Fc $\epsilon$ RI and c-kit expression in BMCMCs. (A) WT or  $VDR^{-/-}$** 227 BMCMCs were preincubated with  $1\alpha,25(\text{OH})_2\text{D}_3$  ( $10^{-7}$  M) or 0.03% EtOH for 16 h and then228 stimulated with DNP-HSA in the presence of  $1\alpha,25(\text{OH})_2\text{D}_3$  ( $10^{-7}$  M) or 0.03% EtOH for the

229 indicated times. Whole cell lysates were prepared and probed with antibodies to phospho-

230 Erk1/2 (p-Erk1/2) phospho-p-38 (p-p38) phospho-JNK1/2 (p-JNK) and phospho-NF-kB-p65

231 (p-NF-kB). Stripped membranes were re-probed with antibodies to total form of the

232 corresponding phospho-proteins as controls. Results are representative of two similar

233 experiments. (B) Flow cytometric analysis of Fc $\epsilon$ RI and c-kit expression of IgE sensitized234 WT BMCMCs treated with  $10^{-7}$  M  $1\alpha,25(\text{OH})_2\text{D}_3$  for 16 h.

235

236 **Figure E2. CYP27B1 expression in WT and  $VDR^{-/-}$  BMCMCs.** Detection of CYP27B1237 protein in WT and  $VDR^{-/-}$  BMCMCs by (A) immunofluorescence with rabbit anti-CYP27B1238 Ab or isotype control rabbit IgG Ab (Scale: 50  $\mu\text{m}$ ); and (B) flow cytometric analysis.

239 Results are representative of 3 similar independent experiments.

240

241 **Figure E3.  $1\alpha,25(\text{OH})_2\text{D}_3$  does not regulate CYP27B1 expression in BMCMCs.**242 CYP27B1 mRNA expression analysed by qPCR in 5 wk old WT and  $VDR^{-/-}$  BMCMCs243 cultured for 6 h with  $1\alpha,25(\text{OH})_2\text{D}_3$  ( $1\alpha,25\text{D}_3$ ) at indicated concentrations or vehicle (0.03%

244 EtOH). Data are expressed as mean values + SD obtained in 2 independent experiments.

245

246 **Figure E4.  $1\alpha,25(\text{OH})_2\text{D}_3$  treatment reduced HDC and LTC4S mRNA level in IgE-**  
 247 **mediated PCA-affected ears. (A) HDC and (B) LTC4S mRNA expression in ear skin of**  
 248 mice were analysed by qPCR at 3 h after induction of IgE-mediated PCA. Data are expressed  
 249 as mean values + SEM of 4 to 6 mice/group; 3 independent experiments. \*,  $P < 0.05$ ; \*\*,  $P <$   
 250  $0.01$ ; for the indicated comparisons.

251

252 **Figure E5. Ear swelling responses after injection with vehicle (HMEM-Pipes).** Changes  
 253 ( $\Delta$ ) in ear thickness 0-6 h after *i.v.* injection of 200  $\mu\text{g}$  of DNP-HSA into mice and 16 h after  
 254 pretreated with topical application of 0.06 nmol/ear  $1\alpha,25(\text{OH})_2\text{D}_3$  ( $1\alpha25\text{D}_3$ ; circles) or  
 255 vehicle (EPGW; squares) that occurred concurrent with *i.d.* injection of vehicle (left ear) in  
 256  $Kit^{+/+}$  (WT) mice,  $Kit^{W-sh/W-sh}$ , WT  $\text{BMCMC} \rightarrow Kit^{W-sh/W-sh}$ , or  $VDR^{-/-}$   $\text{BMCMC} \rightarrow Kit^{W-sh/W-sh}$   
 257 mice. None of the differences between any of the groups achieved statistical significance  
 258 (defined as  $P < 0.05$ ) by means of two-way ANOVA. These data are from the same mice  
 259 whose results for IgE anti-DNP Ab injected right ears are shown in Fig 3.

260

261 **Figure E6. Epicutaneous application of  $1\alpha,25(\text{OH})_2\text{D}_3$  suppresses IgE-mediated PCA**  
 262 **reactions in a mast cell-VDR-dependent manner.** Changes ( $\Delta$ ) in ear thickness 0-6 h after  
 263 *i.v.* injection of 200  $\mu\text{g}$  of DNP-HSA into mice and 16-22 h after topical application of 0.06  
 264 nmol/ear  $1\alpha,25(\text{OH})_2\text{D}_3$  ( $1\alpha25\text{D}_3$ ; circles) or vehicle (EPGW; squares) that occurred  
 265 concurrent with *i.d.* injection of (A) 20 ng IgE anti-DNP antibody into right ears, or (B)  
 266 HMEM-Pipes vehicle in  $\text{WBB6F}_1\text{-Kit}^{+/+}$  (WT) mice (black marker), mast cell-deficient  
 267  $\text{WBB6F}_1\text{-Kit}^{W/W-v}$  (white marker), WT  $\text{BMCMC} \rightarrow Kit^{W/W-v}$  (blue marker) or  $VDR^{-/-}$   
 268  $\text{BMCMC} \rightarrow Kit^{W/W-v}$  (red marker). Data:  $n = 6$  to 9 mice/group, 2 independent experiments,  
 269 each of which gave similar results. \*\*,  $P < 0.01$ \*\*\*;  $P < 0.001$  for comparisons of

270  $1\alpha,25(\text{OH})_2\text{D}_3$  versus vehicle-treated ears within the same group of mice (as indicated with  
271 colour coding) by two-way ANOVA with Bonferroni post-tests.

272

273 **Figure E7. Dermal mast cell numbers in ear pinnae of C57BL/6J-Kit<sup>+/+</sup> mice, mast cell-**  
274 **deficient Kit<sup>W-sh/W-sh</sup> mice and Kit<sup>W-sh/W-sh</sup> mice engrafted with WT (C57BL/6; WT**  
275 **BMCMC→Kit<sup>W-sh/W-sh</sup> mice), or VDR<sup>-/-</sup> (VDR<sup>-/-</sup> BMCMC→Kit<sup>W-sh/W-sh</sup> ).** BMCMCs were  
276 transferred by means of i.d. injection (each ear received 2 injections;  $1 \times 10^6$  cells/20  $\mu\text{L}$  into  
277 each of 2 sites) into 4-6 week old Kit<sup>W-sh/W-sh</sup> mice. Numbers of mast cells per millimetre of  
278 ear cartilage were counted in toluidine blue-stained ear pinnae sections at the completion of  
279 the PCA experiments outlined in (Fig 3 and Fig E5 Online Repository). Data; n = 9 to 12  
280 mice/group are from 3 independent experiments.

281

282 **Figure E8. Chronic epicutaneous application of  $1\alpha,25(\text{OH})_2\text{D}_3$  suppresses IgE-mediated**  
283 **PCA reactions.** (A) Changes ( $\Delta$ ) in ear thickness of C57BL/6J WT female mice treated with  
284 0.06 nmol/ear or 0.25 nmol/ear  $1\alpha,25(\text{OH})_2\text{D}_3$  ( $1\alpha,25\text{D}_3$ ; right ears) or relevant vehicle  
285 control (EPGW; or EtOH; left ears) every 2 d for 18 d. Data: n = 11 mice/group, 2  
286 independent experiments. (B) TSLP mRNA expression in ear skin of mice from (A) 24 h  
287 after the final  $1\alpha,25(\text{OH})_2\text{D}_3$  topical application. Data: n = 6 mice/group. \*\*, P < 0.01 for  
288 indicated comparison. (C) Changes ( $\Delta$ ) in ear thickness of C57BL/6J WT female mice treated  
289 with 0.06 nmol/ear, 0.25 nmol/ear  $1\alpha,25\text{D}_3$  or relevant vehicle control (EPGW or EtOH)  
290 every 2 d for a total of 9 applications. On day 16 ears were i.d. injected with (C) 20 ng IgE  
291 anti-DNP Ab or (D) HMEM-Pipes vehicle. 16 h later, baseline ear thickness was measured  
292 and mice were then injected i.v. with DNP-HSA and change in ear thickness from measured  
293 at intervals over 6 h. Data; n = 3- 4 mice/group from 2 independent experiments. \*\*\*; P <

294 0.001 for comparisons of  $1\alpha,25(\text{OH})_2\text{D}_3$  versus vehicle-treated ears within the same group of  
295 mice.

296

297 **Figure E9. A single epicutaneous application of high dose (0.25 nmol)  $1\alpha,25(\text{OH})_2\text{D}_3$  can**  
298 **suppress IgE-mediated PCA reactions.** Changes ( $\Delta$ ) in ear thickness 0-6 h after *i.v.*  
299 injection of 200  $\mu\text{g}$  of DNP-HSA. C57BL/6J female mice were pretreated with topical  
300 application of 0.06 nmol/ear  $1\alpha,25(\text{OH})_2\text{D}_3$  ( $1\alpha25\text{D}_3$ ; grey circles) or 0.25 nmol/ear  
301  $1\alpha,25(\text{OH})_2\text{D}_3$  ( $1\alpha25\text{D}_3$ ; black circles), or corresponding vehicle control (EPGW; grey  
302 squares or EtOH; black squares, respectively) and injected *i.d.* with (A) 20 ng IgE anti-DNP  
303 Ab, or (B) HMEM-Pipes vehicle. Data; n = 4 mice/group. \*\*\*; P < 0.001 for comparisons of  
304  $1\alpha,25(\text{OH})_2\text{D}_3$  versus vehicle-treated ears within the same group of mice.

305

306 **Figure E10. Mast cell-VDR and -CYP27B1 activity are required for epicutaneous**  
307 **25OHD<sub>3</sub> dampening of IgE-mediated PCA reactions.** Changes ( $\Delta$ ) in ear thickness 0-6 h  
308 after *i.v.* injection of 200  $\mu\text{g}$  of DNP-HSA into mice and 24-30 h after (A) topical application  
309 of 0.06 nmol/ear 25OHD<sub>3</sub> (circles) or vehicle (EPGW; squares) and 16-22 h after *i.d.*  
310 injection of (A) 20 ng IgE anti-DNP antibody into right ears, or (B) HMEM-Pipes vehicle in  
311 WBB6F<sub>1</sub>-*Kit*<sup>+/+</sup> (WT) mice (black marker), mast cell-deficient WBB6F<sub>1</sub>-*Kit*<sup>W/W<sup>v</sup></sup> (white  
312 marker), WT BMCMC→*Kit*<sup>W/W<sup>v</sup></sup> (blue marker) or *CYP27B1*<sup>-/-</sup> BMCMC→*Kit*<sup>W/W<sup>v</sup></sup> (red  
313 marker). Data: n = 3 to 4 mice/group/experiment, 3 independent experiments, each of which  
314 gave similar results. \*, P < 0.01; \*\*\*; P < 0.001 for comparisons of 25OHD<sub>3</sub> versus vehicle-  
315 treated ears within the same group of mice (as indicated with colour coding) by two-way  
316 ANOVA with Bonferroni post-tests.

317

318 **Figure E11. Ear swelling responses after injection with vehicle (HMEM-Pipes) and**  
319 **dermal mast cell numbers.** Changes ( $\Delta$ ) in ear thickness 0-6 h after *i.v.* injection of 200  $\mu$ g  
320 of DNP-HSA into mice and 24 h after topical application of 0.06 nmol/ear 25OHD<sub>3</sub> (circles)  
321 or vehicle (EPGW; squares) and 16 h after *i.d.* injection of HMEM-Pipes vehicle (left ears) in  
322 *Kit*<sup>+/+</sup> (WT) mice, *Kit*<sup>W-sh/W-sh</sup>, WT BMCMC $\rightarrow$ *Kit*<sup>W-sh/W-sh</sup>, (A) *VDR*<sup>-/-</sup> BMCMC $\rightarrow$ *Kit*<sup>W-sh/W-</sup>  
323 <sup>sh</sup>, or (B) *CYP27B1*<sup>-/-</sup> BMCMC $\rightarrow$ *Kit*<sup>W-sh/W-sh</sup> mice. None of the differences between any of  
324 the groups achieved statistical significance (defined as  $P < 0.05$ ) by means of two-way  
325 ANOVA. (C and D) Dermal mast cell numbers in ear pinnae of the same groups of mice as  
326 indicated in (A) and (B) and whose results for IgE anti-DNP Ab injected right ears are shown  
327 in Fig 4, A and B. Numbers of mast cells per millimetre of ear cartilage were counted in  
328 toluidine blue-stained ear pinnae sections at the completion of the PCA experiments.

329

330 **Figure E12. 1 $\alpha$ ,25(OH)<sub>2</sub>D<sub>3</sub> can impair activation of IgE-mediated peripheral blood-**  
331 **derived mast cells.** PBMCs pre-treated with 1 $\alpha$ ,25(OH)<sub>2</sub>D<sub>3</sub> (1 $\alpha$ 25D<sub>3</sub>) or vehicle (0.03%  
332 EtOH) at the time of sensitization with human myeloma IgE for 16 h, followed by challenge  
333 with anti-human IgE antibody for 30 min and release of (A) histamine and (B) Cys-LT into  
334 the supernatants. Data: 3 to 4 different PBMC batches. \*,  $P < 0.05$ ; \*\*,  $P < 0.01$ ; for the  
335 indicated comparisons. (C) VDR expression in CBMCs. (D) CYP27B1 and  $\beta$ -actin protein  
336 expression in CBMCs cultured for 8 h with 25OHD<sub>3</sub> at the indicated concentrations or  
337 vehicle (EtOH).

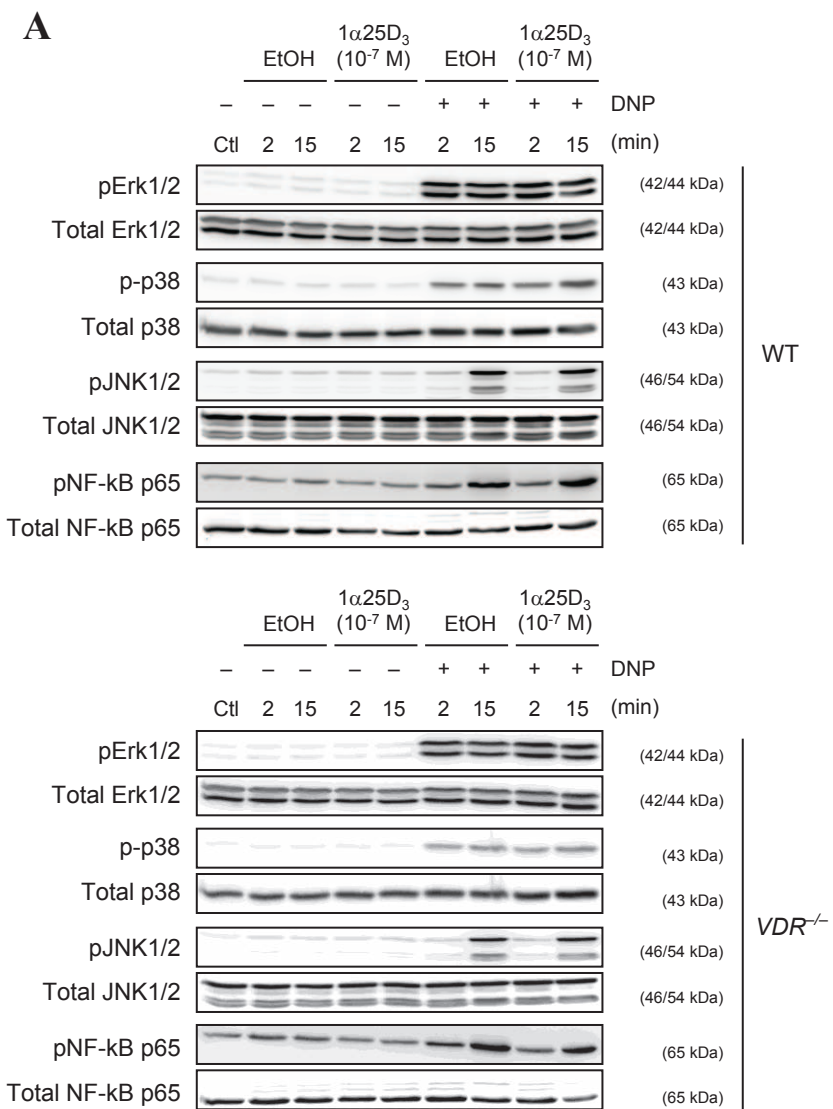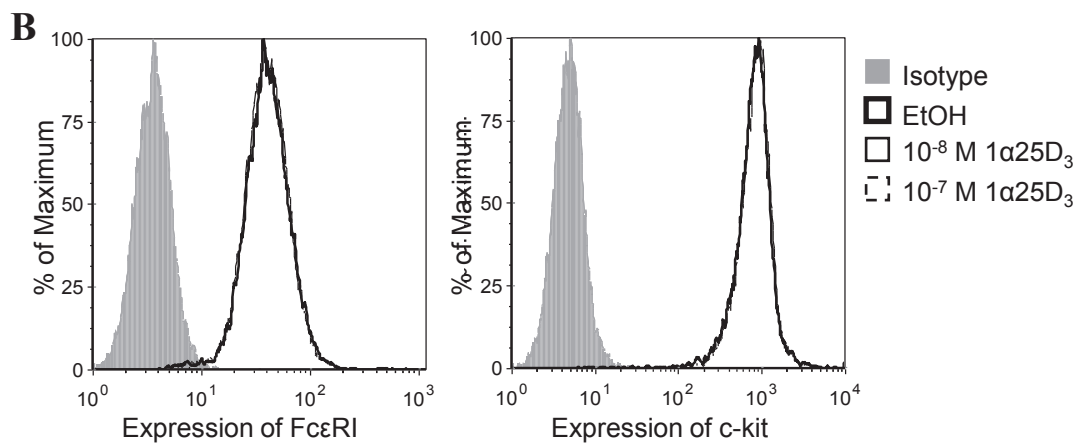



Figure E2

Yip *et al.*

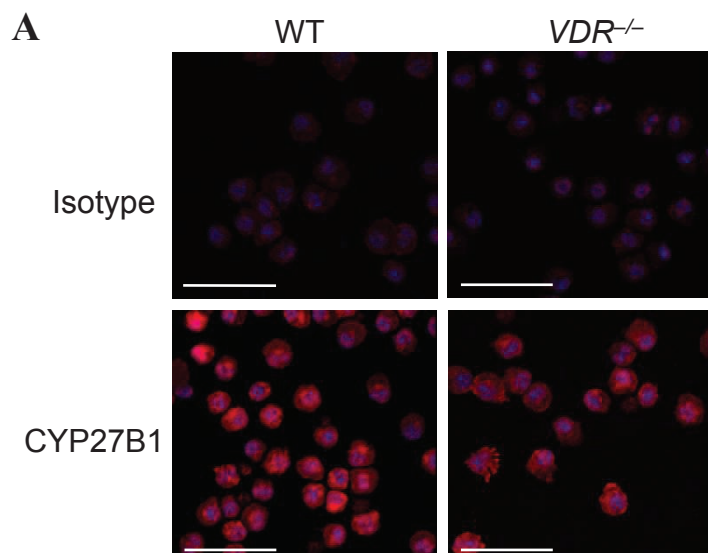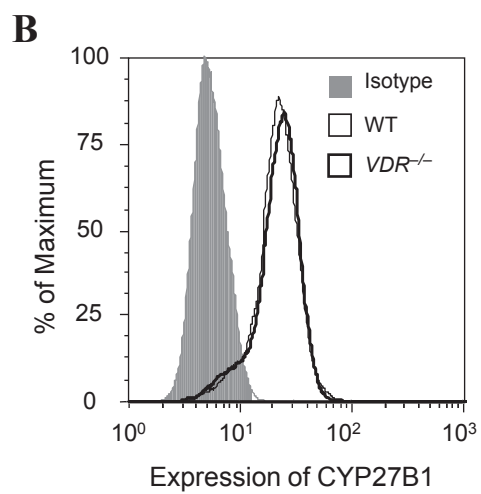

Figure E3

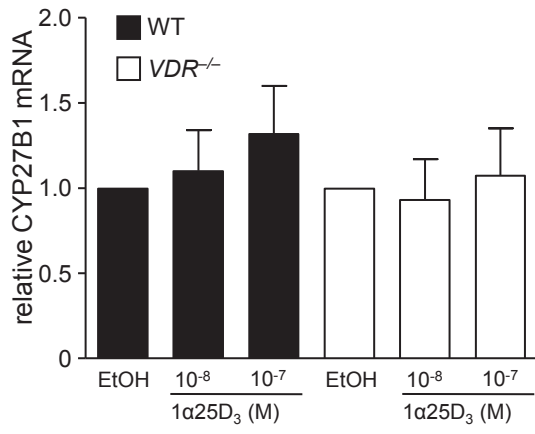

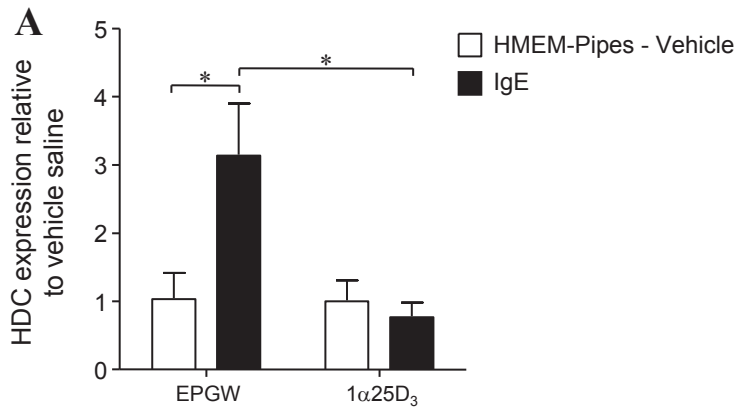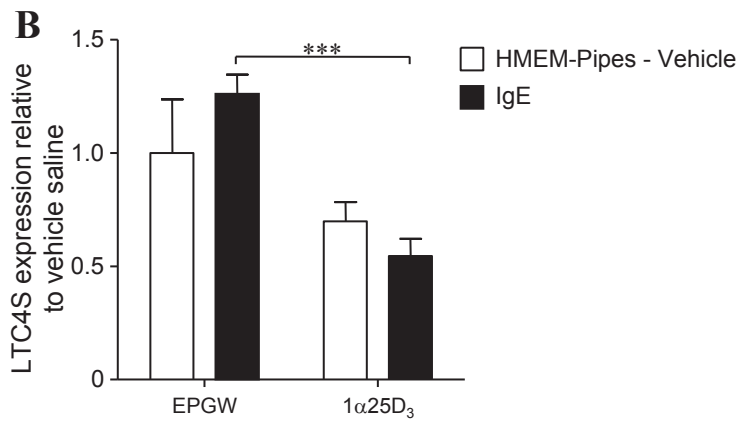

Figure E5

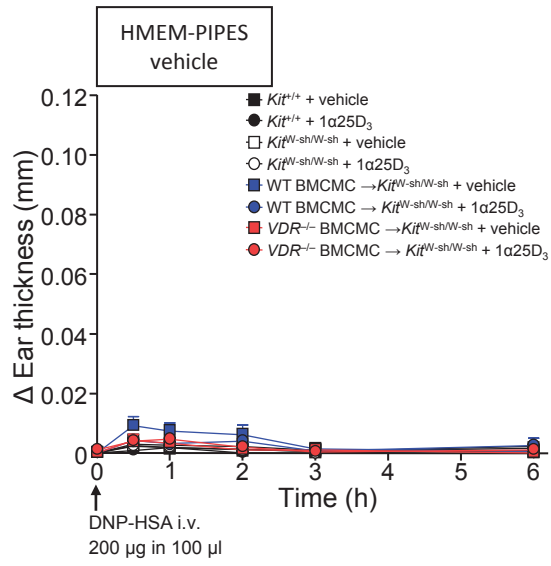



Figure E7

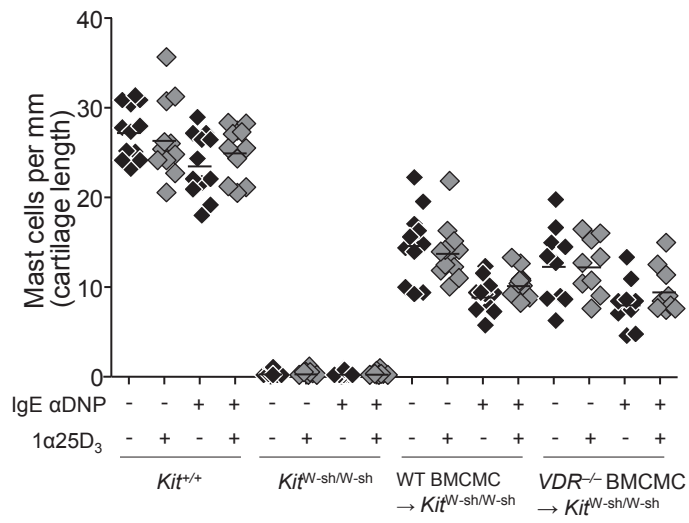

Figure E8

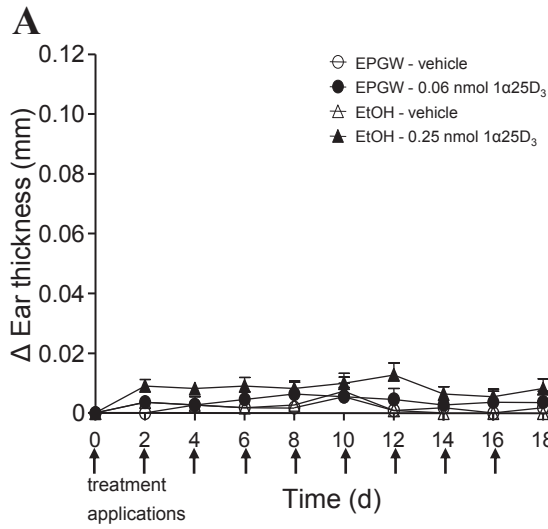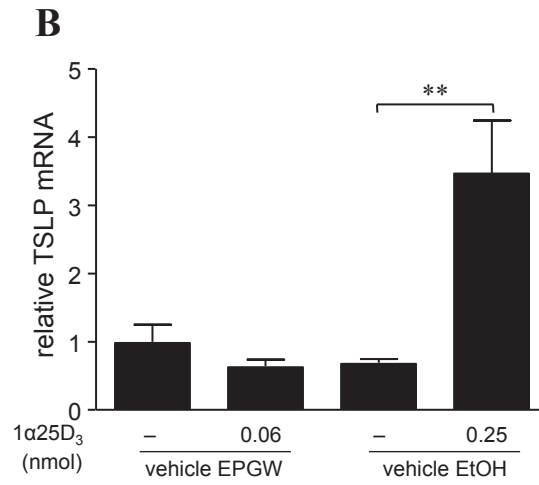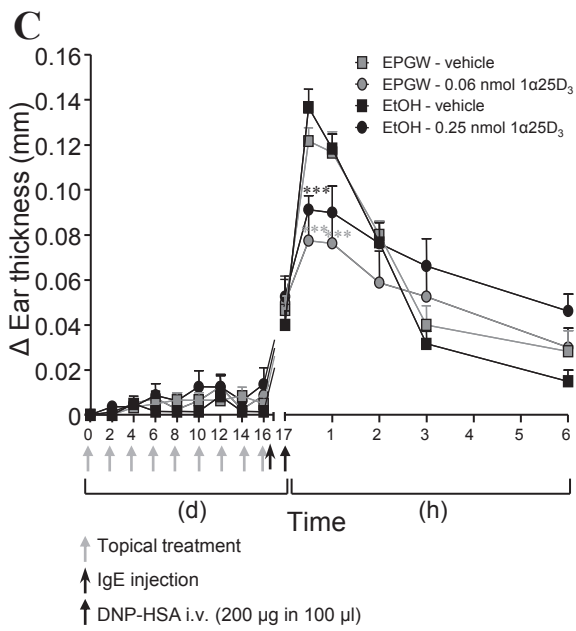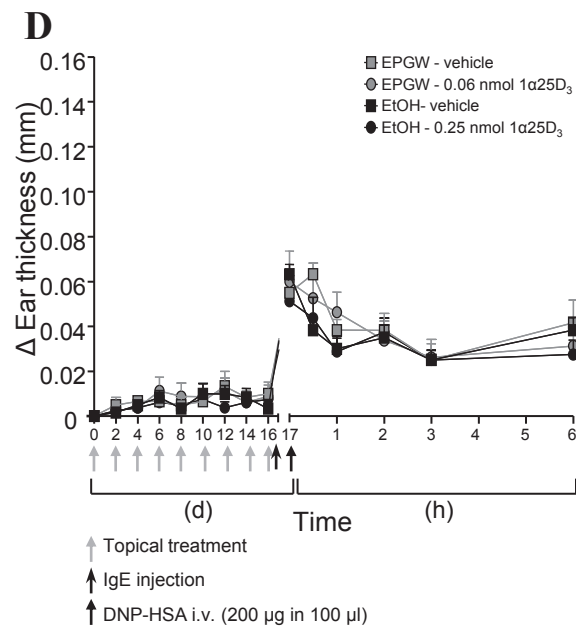

Figure E9

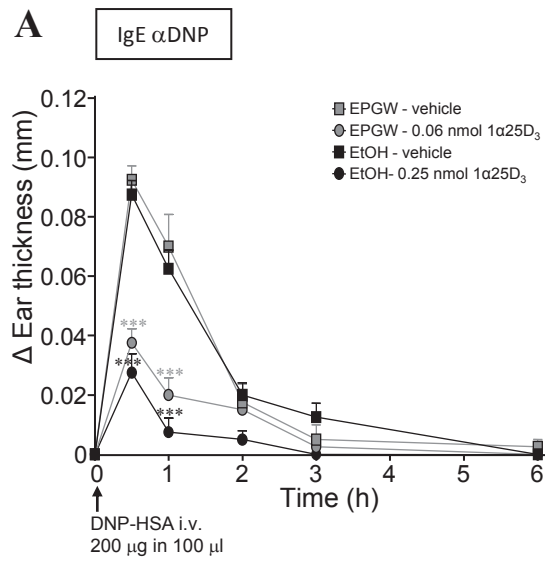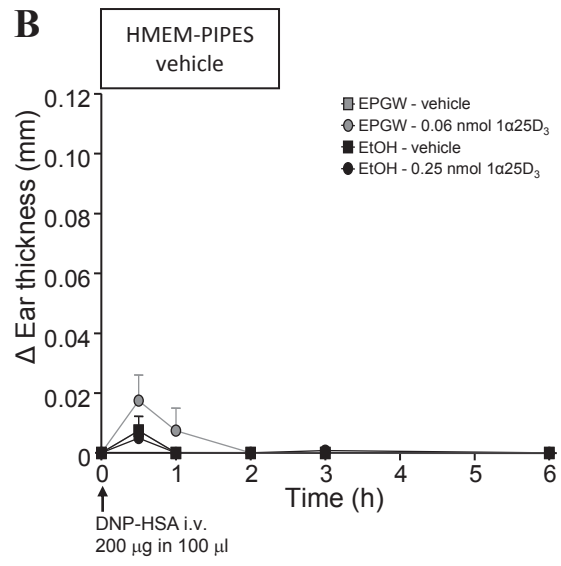



Figure E10

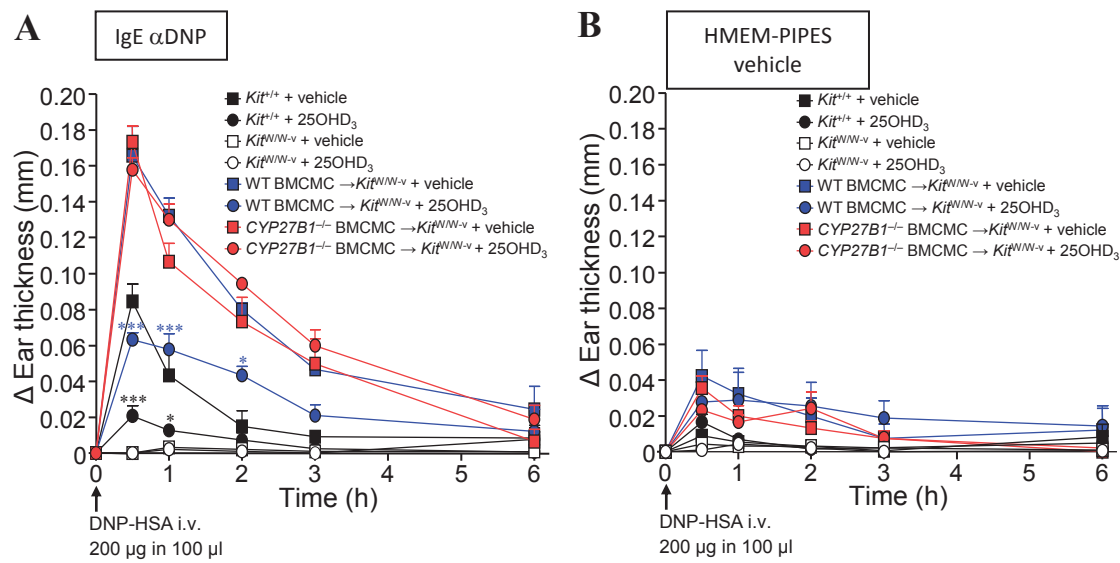

**Figure E11**

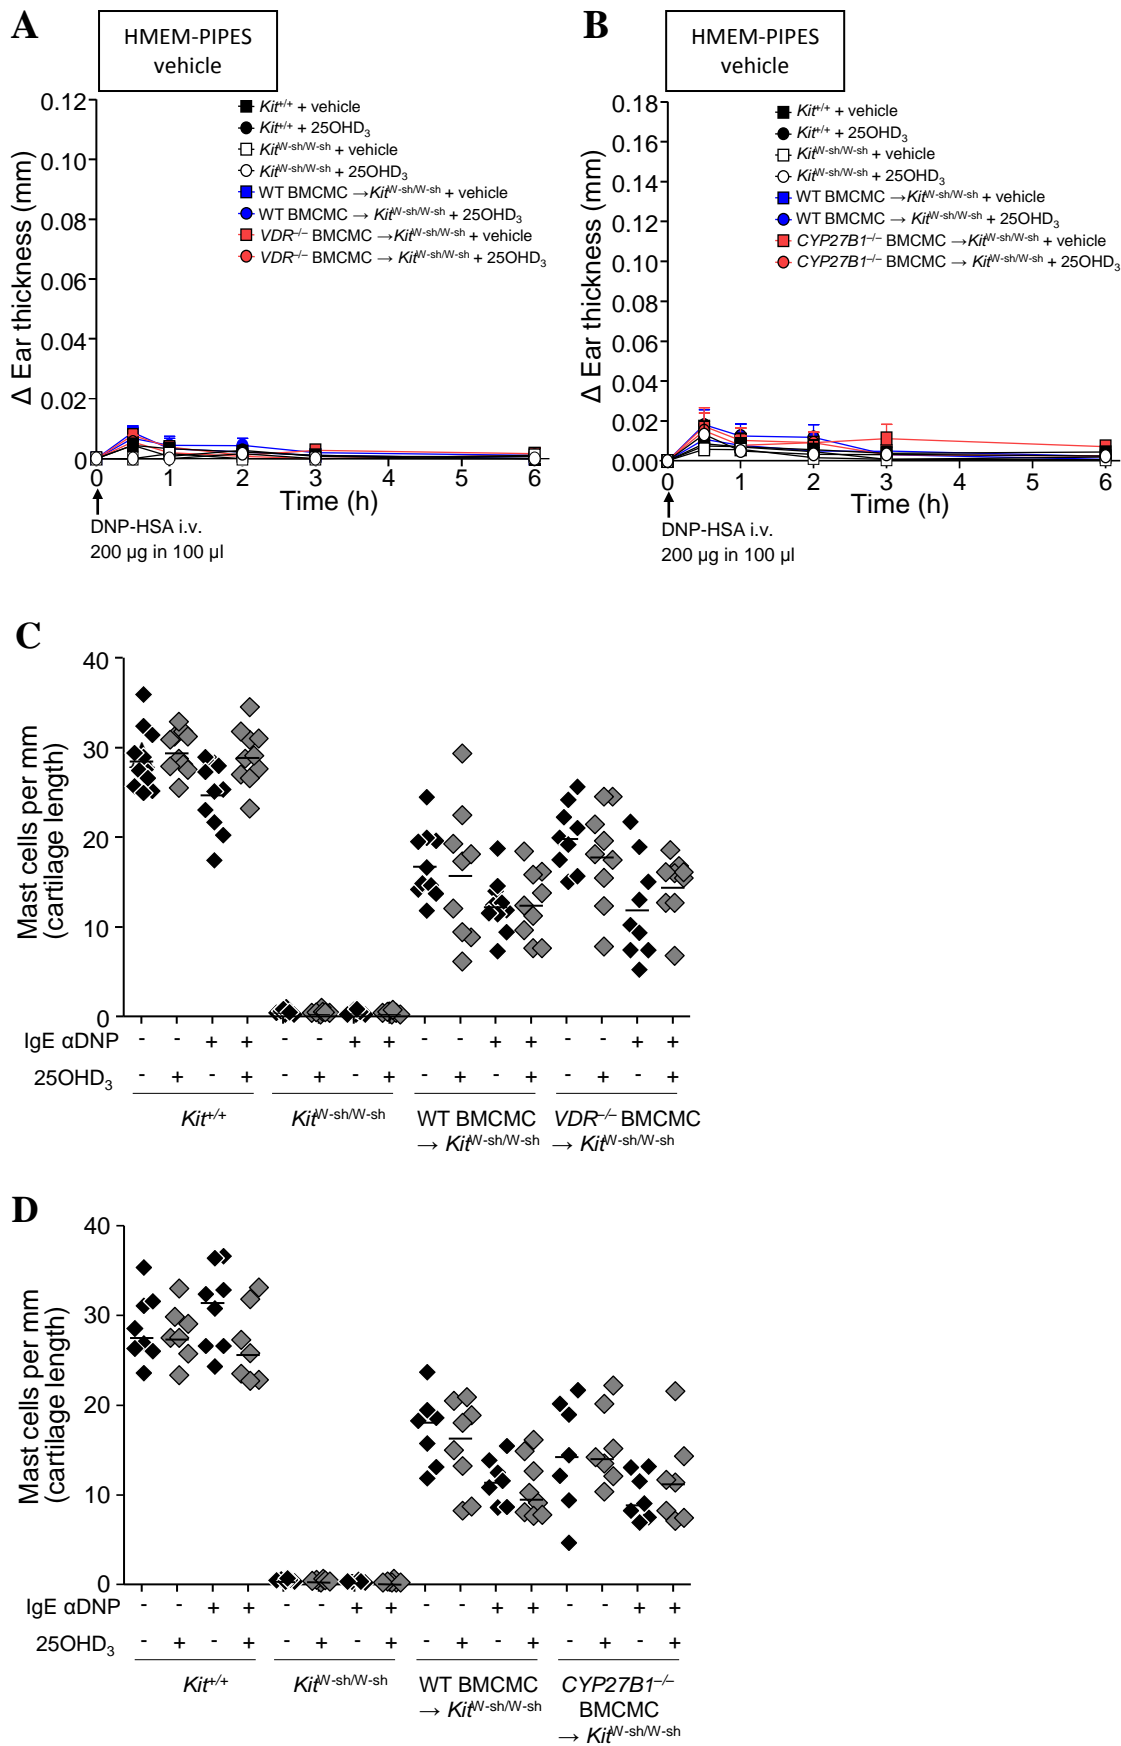

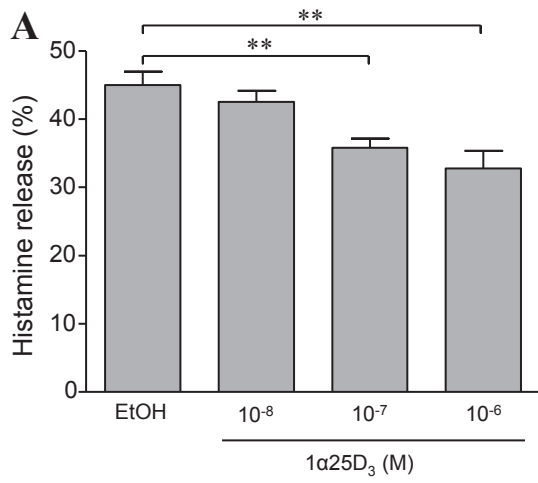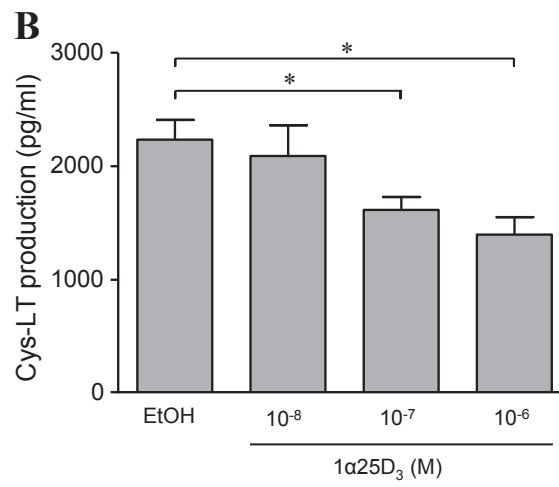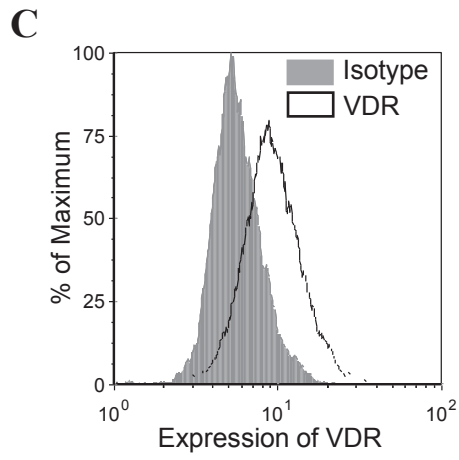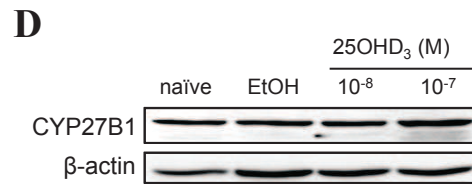

Supplement: NIHMS559975-supplement-supplement_1.pdf [file NIHMS559975-supplement-supplement_1.pdf]
